# Supplementary material for: Cyclodextrin-Based Nanohydrogels Containing Polyamidoamine Units: A New Dexamethasone Delivery System for Inflammatory Diseases
Source: PubMed Central journal article supplement (PMC6318607; doi:10.3390/gels3020022), 2017-06-08
Supplement: gels-03-00022-s001.pdf [file gels-03-00022-s001.pdf]

# Cyclodextrin-Based Nanohydrogels Containing Polyamidoamine Units: A New Dexamethasone Delivery System for Inflammatory Diseases

Monica Argenziano, Chiara Dianzani, Benedetta Ferrara, Shankar Swaminathan, Amedea Manfredi, Elisabetta Ranucci, Roberta Cavalli and Paolo Ferruti

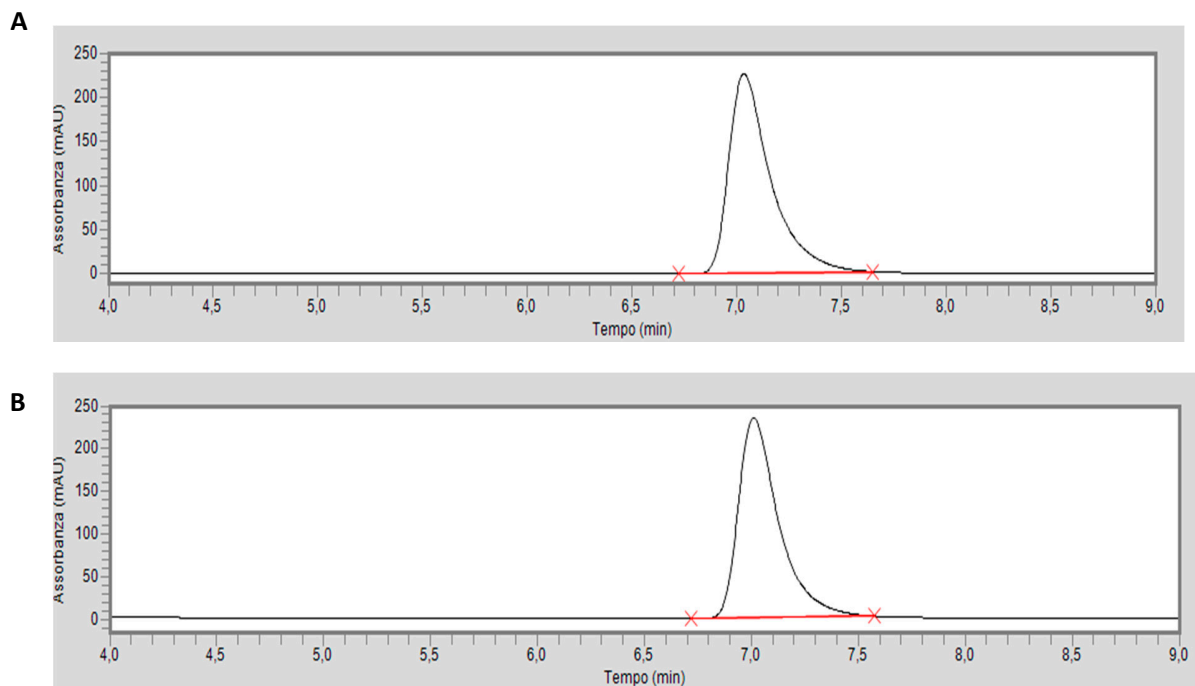

**Figure S1.** Chromatograms of dexamethasone standard solution (A) and dexamethasone released from  $\beta$ -CD/PAA (B).
